# Supplementary material for: Comprehensive Cardiovascular Risk Factor Control With a Mobile Health Cardiovascular Risk Self‐Management Program
Source: PubMed Central journal article supplement — J Am Heart Assoc. 2024 May 17;13(10):e033328. doi: 10.1161/JAHA.123.033328 (PMC11179803; doi:10.1161/jaha.123.033328), 2024-05-17
Supplement: JAH3-13-e033328-s001.pdf [file JAH3-13-e033328-s001.pdf]

# **SUPPLEMENTAL MATERIAL**

**Table S1. Multiple regression analysis to identify variables associated with change in systolic blood pressure**

| Variable                      | 12 weeks                |                 |         | 1 year                  |                 |         | 2 years                 |                 |          |
|-------------------------------|-------------------------|-----------------|---------|-------------------------|-----------------|---------|-------------------------|-----------------|----------|
|                               | Estimate<br>( $\beta$ ) | 95 % CI         | p-value | Estimate<br>( $\beta$ ) | 95 % CI         | p-value | Estimate<br>( $\beta$ ) | 95 % CI         | p-value  |
| Age squared                   | 0.0003                  | -0.0003,0.0010  | 0.3153  | 0.0006                  | -0.0002,0.0015  | 0.1350  | 0.0002                  | -0.0008,0.0012  | 0.6972   |
| Age                           | -0.0734                 | -0.1451,-0.0018 | 0.0446  | -0.1194                 | -0.2115,-0.0274 | 0.0110  | -0.0640                 | -0.1728,0.0449  | 0.2493   |
| Male sex                      | 0.1063                  | -0.2199,0.4326  | 0.5229  | -0.7338                 | -1.1344,-0.3333 | 0.0003  | -1.4051                 | -1.9180,-0.8922 | <0.0001  |
| Log daily insights read       | 0.0675                  | -0.0402,0.1753  | 0.2190  | 0.0554                  | -0.0691,0.1800  | 0.3830  | 0.2059                  | 0.0496,0.3622   | 0.0098   |
| Log correlation insights read | -0.6022                 | -0.7750,-0.4293 | <0.0001 | -0.8803                 | -1.0982,-0.6624 | <0.0001 | -1.0394                 | -1.3793,-0.6995 | <0.0001  |
| Log number of BP measurements | -0.4952                 | -0.6372,-0.3533 | <0.0001 | -0.5788                 | -0.7588,-0.3988 | <0.0001 | -0.8277                 | -1.0571,-0.5983 | < 0.0001 |

Negative sign indicates reduction in blood pressure; BP = blood pressure, CI = confidence interval

**Table S2. Multiple regression analysis to identify variables associated with change in diastolic blood pressure**

| Variable                      | 12 Weeks                |                 |         | 1 Year                  |                 |         | 2 Years                 |                 |         |
|-------------------------------|-------------------------|-----------------|---------|-------------------------|-----------------|---------|-------------------------|-----------------|---------|
|                               | Estimate<br>( $\beta$ ) | 95% CI          | p-value | Estimate<br>( $\beta$ ) | 95% CI          | p-value | Estimate<br>( $\beta$ ) | 95% CI          | p-value |
| Age Squared                   | 0.0002                  | -0.0002,0.0007  | 0.3084  | 0.0004                  | -0.0001,0.0010  | 0.1320  | 0.0005                  | -0.0002,0.0012  | 0.1666  |
| Age                           | -0.0456                 | -0.0935,0.0022  | 0.0613  | -0.0775                 | -0.1389,-0.0161 | 0.0134  | -0.0919                 | -0.1645,-0.0193 | 0.0131  |
| Male Sex                      | -0.1491                 | -0.3667,0.0686  | 0.1795  | -0.4127                 | -0.6800,-0.1455 | 0.0025  | -0.7104                 | -1.0526,-0.3682 | <0.0001 |
| Log Daily Insights Read       | 0.0516                  | -0.0202,0.1234  | 0.1592  | 0.09612                 | 0.0131,0.1792   | 0.0233  | 0.1022                  | -0.0021,0.2064  | 0.0548  |
| Log Correlation Insights Read | -0.4544                 | -0.5696,-0.3391 | <0.0001 | -0.6426                 | -0.7880,-0.4973 | <0.0001 | -0.6886                 | -0.9153,-0.4619 | <0.0001 |
| Log Number of BP Measurements | -0.3328                 | -0.4266,-0.2371 | <0.0001 | -0.4500                 | -0.5702,-0.3298 | <0.0001 | -0.5411                 | -0.6943,-0.3880 | <0.0001 |

Negative sign indicates reduction in blood pressure; BP = blood pressure, CI = confidence interval

**Table S3. Multiple regression analysis to identify variables associated with rate of change in total cholesterol**

| <b>Variable</b>                      | <b>Estimate (<math>\beta</math>)</b> | <b>95 % CI</b>     | <b>p value</b> |
|--------------------------------------|--------------------------------------|--------------------|----------------|
| Age Squared                          | -0.00004                             | -0.0009, 0.0001    | 0.2761         |
| Age                                  | -0.00232                             | -0.00532, 0.00132  | 0.4125         |
| Male Sex                             | -0.03286                             | -0.04458,-0.01172  | 0.0238         |
| Rate of Insights Read                | -0.06924                             | -0.10887,-0.02961  | 0.0094         |
| Rate of Cholesterol Measurement      | -0.08721                             | -0.13640, -0.03802 | <0.001         |
| Cholesterol Medication Listed in App | -0.09548                             | -0.13041, -0.06055 | 0.00042        |

To control for variation in the duration between cholesterol measurements, cholesterol measurements were calculated as measurements per month and number of insights read were calculated as number per day. Rate of insights read included both daily insights and correlation insights. App = application; CI = confidence interval

**Table S4. Multiple regression analysis to identify variables associated with rate of change in LDL-C**

| <b>Variables</b>                         | <b>Estimate (<math>\beta</math>)</b> | <b>95 % CI</b>     | <b>p value</b> |
|------------------------------------------|--------------------------------------|--------------------|----------------|
| Age squared                              | -0.00004                             | -0.00012, 0.00004  | 0.20772        |
| Age                                      | -0.00117                             | -0.00327, 0.00127  | 0.24758        |
| Male sex                                 | -0.00653                             | -0.01172, -0.00134 | 0.01646        |
| Rate of Insights read                    | -0.04023                             | -0.07481, -0.00565 | 0.03628        |
| Rate of cholesterol measurement          | -0.15293                             | -0.20065, -0.10521 | <0.001         |
| Cholesterol medication listed in the app | -0.03947                             | -0.05692, -0.02202 | 0.00623        |

To control for variation in the duration between cholesterol measurements, cholesterol measurements were calculated as measurements per month and number of insights read were calculated as number per day. Rate of insights read included both daily insights and correlation insights. App = application; CI = confidence interval, LDL-C = low-density lipoprotein cholesterol

**Table S5. Multiple regression analysis to identify variables associated with rate of change in weight**

| <b>Variable</b>             | <b>Estimate (<math>\beta</math>)</b> | <b>95% CI</b>      | <b>p-value</b> |
|-----------------------------|--------------------------------------|--------------------|----------------|
| Age Squared                 | -0.00001                             | -0.00003, 0.00001  | 0.67142        |
| Age                         | -0.00242                             | -0.00642, 0.00242  | 0.11623        |
| Male Sex                    | 0.016902                             | 0.012761, 0.021043 | <0.001         |
| Rate of Insights Read       | -0.01683                             | -0.02391, -0.00975 | <0.001         |
| Rate of Weight Measurements | -0.05659                             | -0.06982, -0.04336 | <0.001         |

To control for variation in the duration between weight measurements, number of weight measurements per day and number of insights read per day were calculated. Rate of insights read included both daily insights and correlation insights. CI = confidence interval

**Figure S1. Patient flow chart**

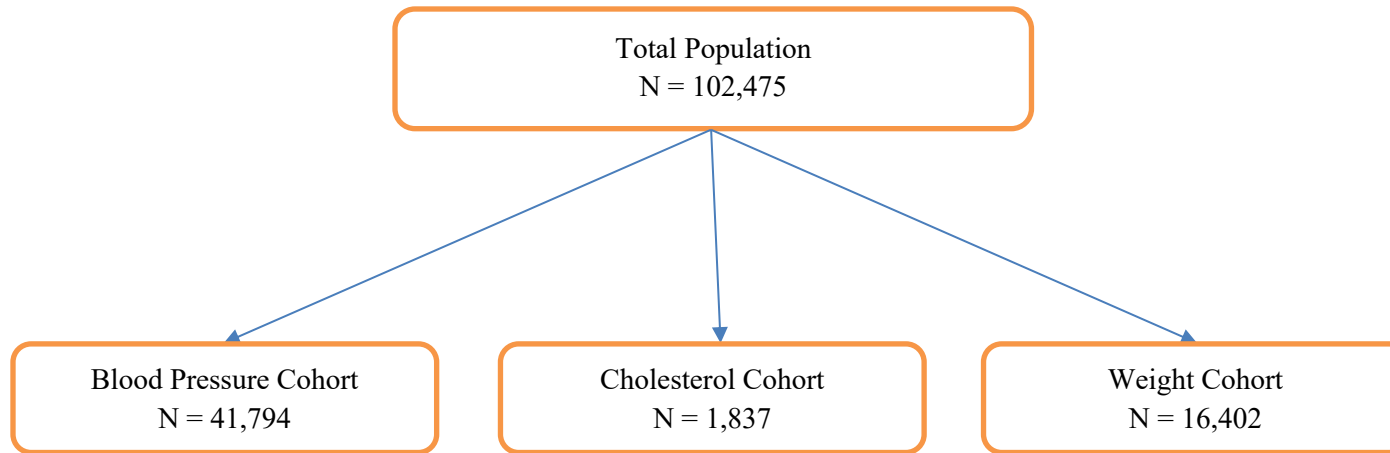

Participants were included in the BP cohort if they had at least two BP readings available, including one at baseline and one at any one of the follow-up time points (for 12 week follow-up, BP measurement made during weeks 11 – 12; for 1 year follow-up, BP measurement during weeks 48 to 55; for 2 years follow-up, BP measurements during weeks 96 to 111). Participants were included in the cholesterol cohort if they had at least two cholesterol test results available that were at least 30 days apart, including a baseline cholesterol value defined as a TC or LDL-C test result available up to six months before or one month after the registration in the program. Participants were included in the weight cohort if they had at least two weight measures available that were at least 30 days apart during the study period, including a baseline weight measure defined as weight measurement entered up to one month before or one month after the registration in the program.

BP = blood pressure; LDL-C = low-density lipoprotein cholesterol; TC = total cholesterol

Figure S2. Example of daily insights

9:41 📶 🔋

 **Happy Thursday,** ?  
**Jessica!**

About 9 hours ago New

Hey Jessica, last week you walked for 54 minutes, an **average of 8 walking minutes a day**. Physical activity is part of getting your blood pressure under control. Keep up the good work!



We're all pretty busy, but try to **add 2 more walking minutes** to your daily average. Walk around the room while you're on the phone or take a quick stroll outside!

[View your Activity Tracker](#)

Helpful  Not Helpful

    

Tracker Medications **Today's Insights** Medical Info Me

May 08, 2023 New

Overnight oats are a great, easy breakfast. Just add some apples, cinnamon, low-fat milk, and oats to a bowl and stick it in the fridge overnight. In the morning you'll have a tasty, cholesterol-friendly breakfast!

Helpful  Not helpful

May 08, 2023

If you can't sustain exercise for 30 minutes at a time, break the activity up into more manageable thirds. A 10-minute walk sounds totally doable, right?

Helpful  Not helpful



**Figure S3. Example of correlation insights showing relationship between increase in physical activity and reduction in systolic blood pressure**

Hey Jessica, it looks like the **more you walk**, the more you **reduce your blood pressure**.

Take a look at your weekly average systolic blood pressure and walking minutes over 4 weeks:

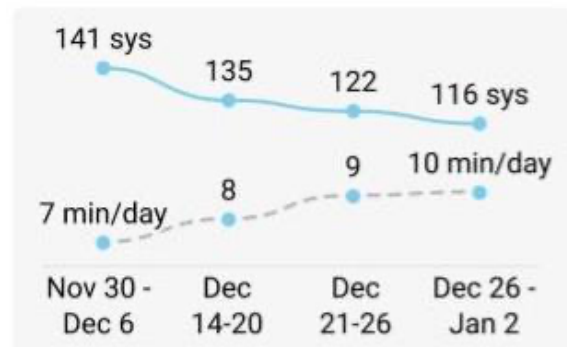

Take your headphones, put on the music you love most, and **take a 10-minute walk** around the block today. It'll also help you relax!

**Figure S4. Example of correlation insight showing relationship between addition of antihypertensive medication and reduction in systolic blood pressure**

Hey Melton, we've got a great update!

On Oct 7, 2020, you added a medication called [Lisinopril](#). When you started taking it, your blood pressure went down and has stayed steady since.

Here's a look at your average monthly blood pressure:

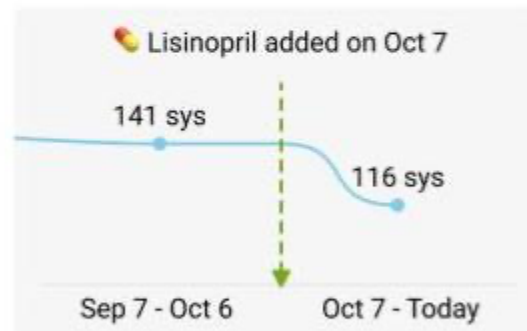

Remember, Lisinopril can only work if you take it. Talk to your doctor if you have questions! **Keep up the good work!**
